# Supplementary material for: The indirect health effects of malaria estimated from health advantages of the sickle cell trait
Source: PubMed Central journal article supplement (PMC6382840; doi:10.1038/s41467-019-08775-0), 2019-02-20
Supplement: 41467_2019_8775_MOESM1_ESM.pdf [file 41467_2019_8775_MOESM1_ESM.pdf]

**Supplementary Table 1.** The clinical phenotypes of hospital-admitted patients, defined hierarchically.

| <b>Syndrome</b>         | <b>HbAA<br/>N=16,502</b> | <b>HbAS<br/>N=1,791</b> |
|-------------------------|--------------------------|-------------------------|
| Neonatal conditions     | 1,615 (9.8)              | 224 (12.5)              |
| Bacteremia              | 709 (4.3)                | 83 (4.6)                |
| Severe malaria          | 797 (4.8)                | 17 (1.0)                |
| Malaria                 | 6,223 (37.7)             | 348 (19.4)              |
| Severe anemia           | 380 (2.3)                | 50 (2.8)                |
| Meningitis/encephalitis | 973 (5.9)                | 140 (7.8)               |
| Severe malnutrition     | 580 (3.5)                | 82 (4.6)                |
| Very severe pneumonia   | 3,401 (20.6)             | 531 (29.7)              |
| Severe pneumonia        | 133 (0.8)                | 20 (1.1)                |
| Gastroenteritis         | 622 (3.8)                | 92 (5.1)                |
| Other                   | 1,069 (6.5)              | 204 (11.4)              |

**Supplementary Table 2.** Odds ratios for specific hierarchically-defined clinical phenotypes.

| <b>Diagnosis</b>        | <b>OR (95% CI)*</b> | <b>P</b> | <b>aOR (95% CI)*</b> | <b>P</b> |
|-------------------------|---------------------|----------|----------------------|----------|
| Neonatal conditions     | 0.79 (0.67-0.93)    | 0.005    | 0.79 (0.67-0.93)     | 0.005    |
| Bacteremia              | 0.67 (0.53-0.85)    | 0.001    | 0.70 (0.54-0.91)     | 0.007    |
| Severe malaria          | 0.12 (0.07-0.20)    | <0.0001  | 0.12 (0.08-0.20)     | <0.0001  |
| Malaria                 | 0.32 (0.28-0.37)    | <0.0001  | 0.31 (0.27-0.37)     | <0.0001  |
| Severe anemia           | 0.75 (0.55-0.98)    | 0.039    | 0.75 (0.55-1.04)     | 0.095    |
| Meningitis/encephalitis | 0.82 (0.68-0.99)    | 0.049    | 0.83 (0.67-1.04)     | 0.11     |
| Severe malnutrition     | 0.81 (0.63-1.03)    | 0.088    | 0.81 (0.62-1.06)     | 0.13     |
| Very severe pneumonia   | 0.89 (0.79-1.01)    | 0.066    | 0.92 (0.79-1.07)     | 0.27     |
| Severe pneumonia        | 0.86 (0.53-1.38)    | 0.53     | 0.87 (0.53-1.43)     | 0.59     |
| Gastroenteritis         | 0.85 (0.67-1.06)    | 0.16     | 0.86 (0.66-1.11)     | 0.24     |
| Other                   | 1.06 (0.91-1.24)    | 0.46     | 1.16 (0.99-1.36)     | 0.072    |

Crude (OR) and adjusted (aOR) odds ratios derived through comparison of allele frequencies in cases versus community controls by logistic regression, without or with adjustment respectively for gender and division of residence. P-values were estimated using logistic regression.
